# Supplementary material for: A New Cytotoxic Pregnanone from Calotropis gigantea
Source: MDPI journal article supplement (doi:10.3390/molecules13123033), 2008-12-04
Supplement: s1 [file s1]

Correction

**Correction: Wang, Z.-N., et al. A New Cytotoxic Pregnanone from *Calotropis gigantean*. Molecules 2008, 13, 3033–3039.**

**Zhu-Nian Wang<sup>1,\*</sup>, Mao-Yuan Wang<sup>1</sup>, Wen-Li Mei<sup>2</sup>, Zhuang Han<sup>2</sup> and Hao-Fu Dai<sup>1,2,\*</sup>**

<sup>1</sup> Institute of Crops Genetic Resources, Chinese Academy of Tropical Agricultural Sciences, Danzhou, 571737, P. R. China; E-mails: wmy81@163.com (M.-Y. W.); wangzhunian@yahoo.com.cn (Z.-N. W.)

<sup>2</sup> Institute of Tropical Bioscience and Biotechnology, Chinese Academy of Tropical Agricultural Sciences, Haikou, 571101, P. R. China; E-mails: hanzone@yahoo.cn (Z. H.); meiwenli@yahoo.com.cn (W.-L. M.)

\* Author to whom correspondence should be addressed; E-mail: hfdai@yahoo.cn.

Received: 14 January 2009 / Published: 15 January 2009

We wish to report the following errors in our paper recently published in Molecules [1]: on page 3035, the correct name of compound **1** should be 12-*O*-benzoyl-3,14,17-trihydroxypregn-5-en-20-one. Then, in Figure 1 on page 3034, compound **2** should appear as saturated at C5-C6 with a 5- $\alpha$  H. On page 3037, the molecular formula of compound **2** should be C<sub>29</sub>H<sub>42</sub>O<sub>9</sub>, its m.p. should be 265 – 267 °C, and the FAB-MS (neg.) of compound **2** should be *m/z* 533 [M-H]<sup>−</sup>. Figure 1 below shows the revised structures of compounds **1** and **2**. The authors apologize for any inconvenience to the readership.

**Figure 1.** Structures of Compounds **1** and **2**.

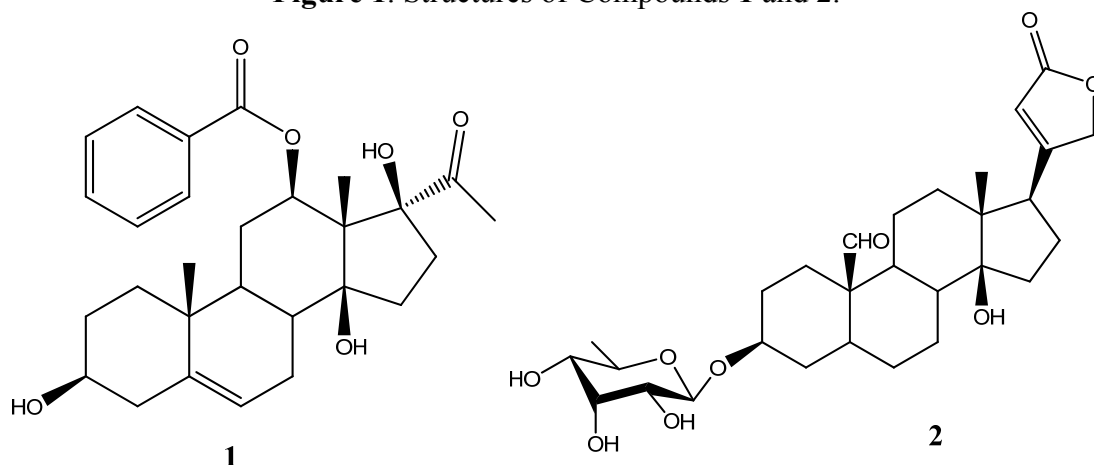

## References

1. Wang, Z.-N.; Wang, M.-Y.; Mei, W.-L.; Han, Z.; Dai, H.-F. A New Cytotoxic Pregnanone from *Calotropis gigantea*. *Molecules* **2008**, *13*, 3033-3039. doi:10.3390/molecules13123033

© 2009 by the authors; licensee Molecular Diversity Preservation International, Basel, Switzerland. This article is an open-access article distributed under the terms and conditions of the Creative Commons Attribution license (<http://creativecommons.org/licenses/by/3.0/>).
